# Supplementary material for: Defect-suppressed submillimeter-scale WS2 single crystals with high photoluminescence quantum yields by alternate-growth-etching CVD
Source: Royal Society of Chemistry journal article supplement (doi:10.1039/d2mh00721e), 2022-01-01
Supplement: d2mh00721e1.pdf [file d2mh00721e1.pdf]

## Supporting Information

### Defect-suppressed submillimeter-scale WS<sub>2</sub> single crystals with high photoluminescence quantum yield by alternate-growth-etching CVD

Xing Xin, Yanmei Zhang, Jiamei Chen, Mao-Lin Chen, Wei Xin, Mengfan Ding, Youzhe Bao, Weizhen Liu,\* Haiyang Xu\* and Yichun Liu

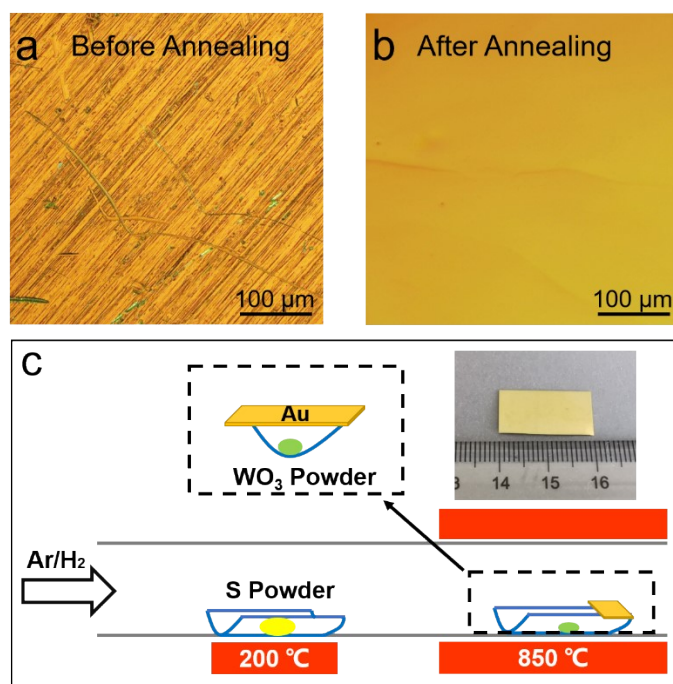

**Figure S1.** Optical images of a Au foil (a) without long-time annealing and (b) with annealing at 1050 °C for more than 12 hours. After annealing the Au foils for 12 hours, the surface becomes smooth and clean, which is beneficial for the growth of large-scale WS<sub>2</sub> single crystals. The annealing treatment is only needed for those Au foils which is used for the first time. (c) Schematic diagram of the synthesis of millimeter-scale monolayer WS<sub>2</sub> single crystals

on Au foils by AGE-CVD. S powder was located outside the high-temperature zone and heated separately. Au is not only a substrate for the deposition of WS<sub>2</sub>, but also can lower the barrier energy for the sulfurization of WO<sub>3</sub>. The extremely low solubility of W in Au suppressed the formation of WS<sub>2</sub> multilayers, which is beneficial for the surface-catalytic growth of uniform monolayer WS<sub>2</sub>.

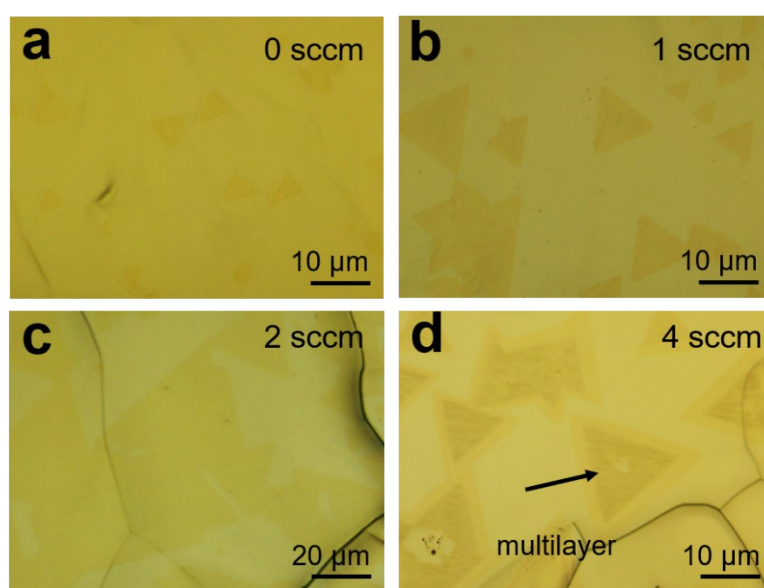

**Figure S2.** Optical images of WS<sub>2</sub> grown on Au foils with different H<sub>2</sub> flow rate of (a) 0 sccm, (b) 1 sccm, (c) 2 sccm and (d) 4 sccm. Except for changing the H<sub>2</sub> flow rate, we keep all the other CVD parameters constant to eliminate the uncertain factors. Ar flow rate is 100 sccm and the growth time for all samples is 3 min. The grain size of monolayer WS<sub>2</sub> increases along with the H<sub>2</sub> flow rate increasing from 0 to 2 sccm. WS<sub>2</sub> multilayers formed when a higher H<sub>2</sub> flow rate was used.

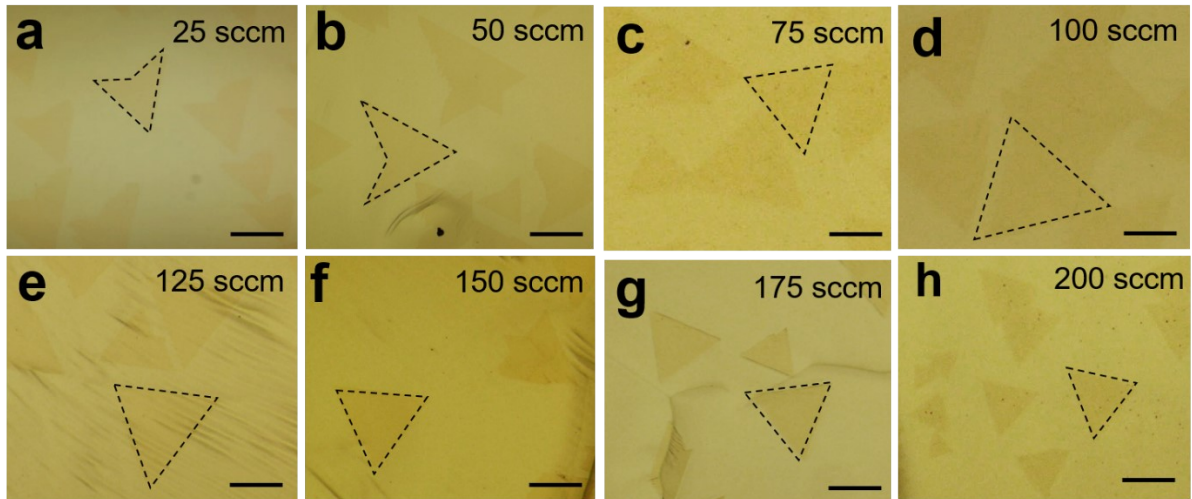

**Figure S3.** Representative morphologies of WS<sub>2</sub> grown on Au foils with increasing the Ar flow rate of (a) 25 sccm, (b) 50 sccm, (c) 75 sccm, (d) 100 sccm, (e) 125 sccm, (f) 150 sccm, (g) 175 sccm, (h) 200 sccm, respectively. Except for changing the Ar flow rate, we keep all the other CVD parameters constant to eliminate the uncertain factors. H<sub>2</sub> flow rate is 2 sccm and growth time is 3 min. The scale bar in all images is 20 μm. The grain size is defined as the edge length of triangle domains. The grain count in Figure 1a, which reflects the nucleation density, is the number of WS<sub>2</sub> grains in the same area as shown in Figure S3.

The grain size of WS<sub>2</sub> increases with the Ar flow rate from 25 to 100 sccm. Then the grain size and nucleation density of WS<sub>2</sub> decreases with the Ar flow rate from 100 to 150 sccm. The maximum grain size and minimum nucleation density were obtained with an Ar flow of 100 and 150 sccm, respectively. When the Ar flow rate is higher than 150 sccm, nucleation density increases because excess growth sources introduced with carrier gas will increase nucleation sites on Au surfaces.

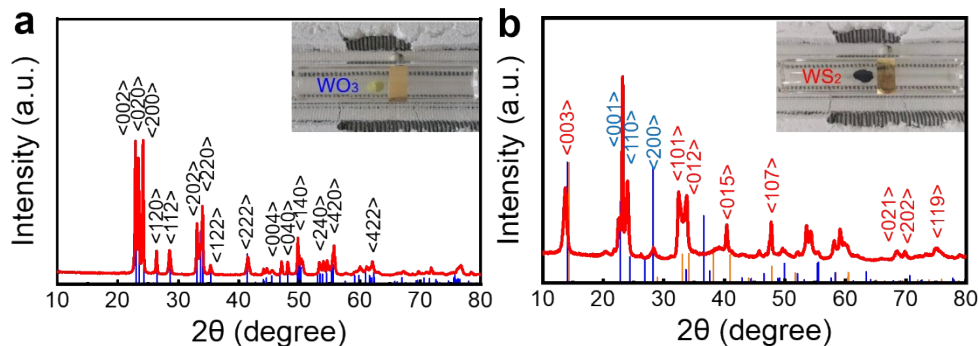

**Figure S4.** X-ray diffraction (XRD) patterns of  $\text{WO}_3$  powders before (a) and after (b) introducing S powders. The crystal facets of  $\text{WO}_3$  and  $\text{WS}_2$  are colored in blue and red, respectively. After a part of  $\text{WO}_3$  powders was sulfurized, the color changed from yellow to black. Both the diffraction peaks of  $\text{WO}_3$  and  $\text{WS}_2$  exist in the XRD patterns, illustrating that a part of S powders reacted with  $\text{WO}_3$  powder at upstream and makes the  $\text{WO}_3$  sulfurized in the quartz boat.

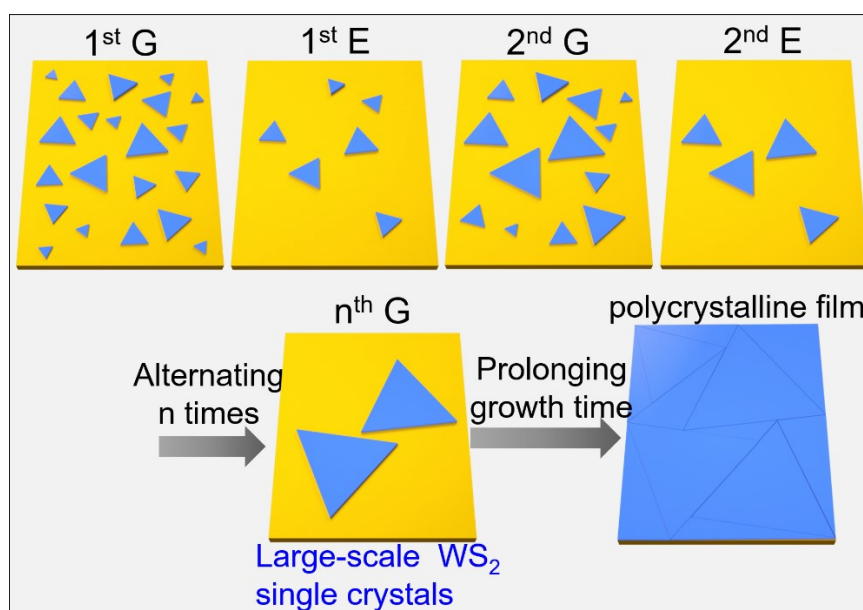

**Figure S5.** Schematic of alternating the growth and etching stage. AGE-CVD can decrease the nucleation density of  $\text{WS}_2$  single crystals, so that we can get a large  $\text{WS}_2$  single-crystal with a submillimeter-scale size by repeating the growth and etching for  $n$  times (the penultimate picture marked by “ $n^{\text{th}}$  G” in Fig. S5). The last picture in Fig. S5 is used to show that when the

individual single-crystal  $\text{WS}_2$  flake connects with each other by extending the growth time, a continuous polycrystalline  $\text{WS}_2$  film will be formed. At this moment, we can't obtain a larger  $\text{WS}_2$  single crystal any more.

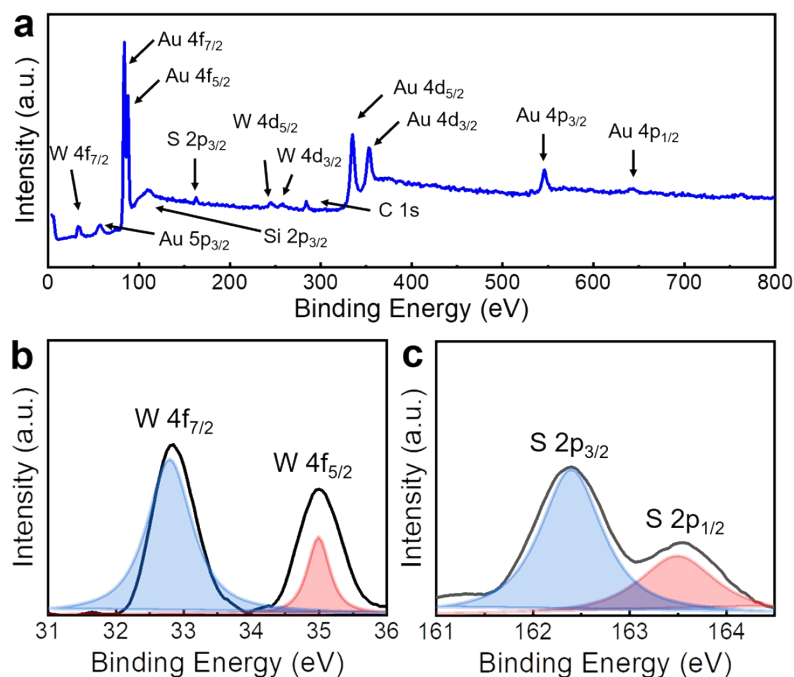

**Figure S6.** (a) XPS spectra of elemental variation taken on the Au foil after  $\text{WS}_2$  growth. The spectra without W-Au alloy signals illustrating the weak interaction between  $\text{WS}_2$  and Au. (b) W 4f and (c) S 2p XPS spectra of  $\text{WS}_2$  grown on the Au foil, representing the formation of  $\text{WS}_2$  on Au foils.

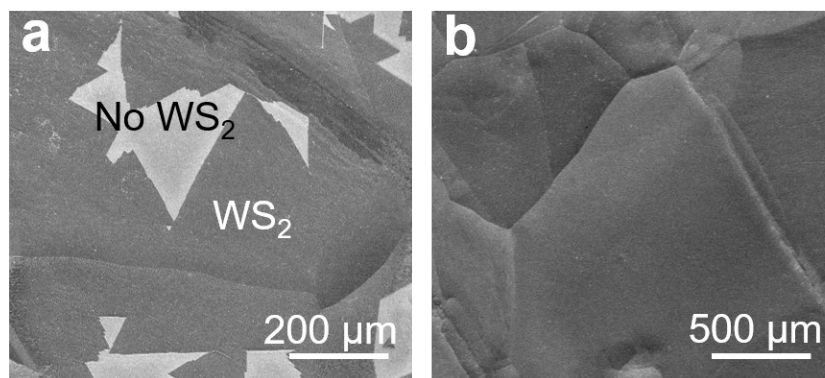

**Figure S7.** The SEM images of (a) single crystal and (b) continuous films of  $\text{WS}_2$ , showing that individual  $\text{WS}_2$  domains can connect with each other and form a continuous  $\text{WS}_2$  film with

further prolonging the growth time of the 5<sup>th</sup> G to (a) 20 min and (b) 25 min. The white arrow in (b) shows the naked Au area without WS<sub>2</sub>. (c)

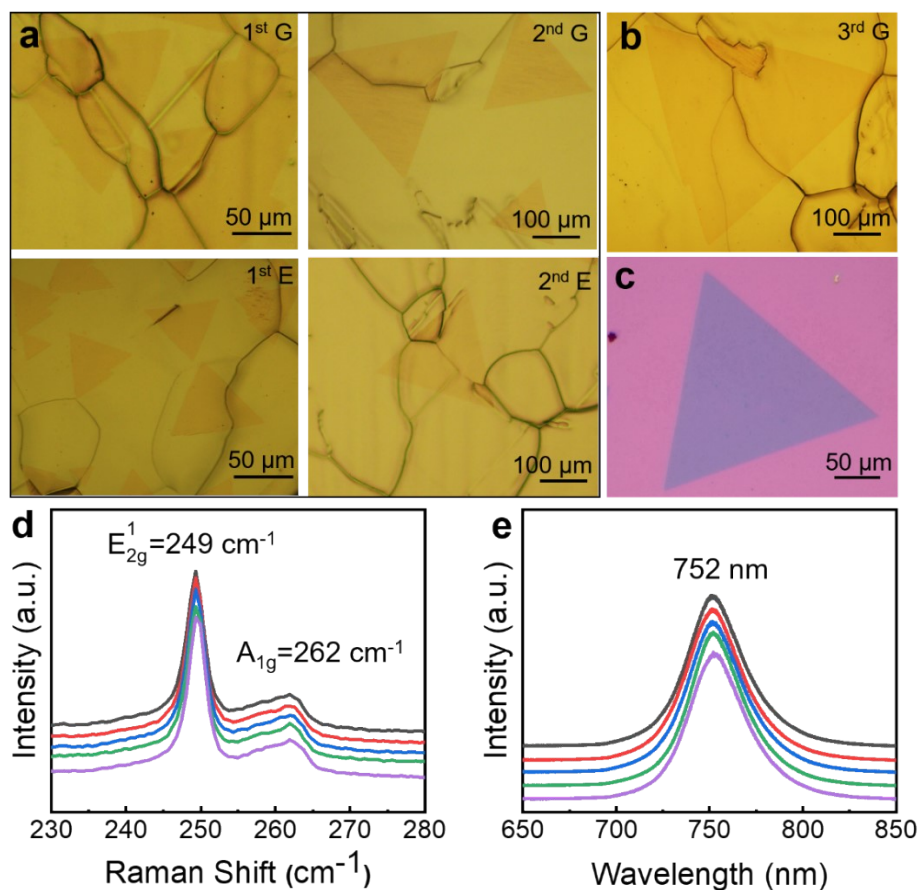

**Figure S8.** (a-b) A series of optical images of WSe<sub>2</sub> domains grown by AGE-CVD. (c) The optical image of as-grown WSe<sub>2</sub> domain transferred to the SiO<sub>2</sub>/Si substrate by electrochemical bubbling method. (d) Raman and (e) PL spectra taken from the different locations of single-crystal WSe<sub>2</sub> domain in (c).

### The synthesis of large-scale single-crystal WSe<sub>2</sub> by AGE-CVD:

We also used AGE-CVD to synthesize large-scale high-quality monolayer single-crystal WSe<sub>2</sub> on Au foils. Single-crystal WSe<sub>2</sub> domains were obtained on Au foils by the same method with changing the growth precursors. The 200 mg Se powder (99.5 wt%) was separately heated to ~350 °C at the upstream of the Au foil outside the high temperature zone. The tube furnace

was heated from room temperature to 700 °C within 20 min and then to 900 °C in 10 min under an Ar flow of 100 sccm. Then after, 5 sccm H<sub>2</sub> was turned on. Large-scale WSe<sub>2</sub> domains with a grain size larger than 500 μm can be obtained after the second cycle.

Figure S8a and b shows that a 500-μm WSe<sub>2</sub> domain was formed at the third growth stage. Similarly, large-scale WSe<sub>2</sub> domain can be completely transferred onto the SiO<sub>2</sub>/Si substrates by electrochemical bubbling transfer method (Figure S8c). The representative Raman E<sub>2g</sub><sup>1</sup> and A<sub>1g</sub> mode in Figure S8d is located at ~ 249 and 262 cm<sup>-1</sup>. The PL spectra in Figure S8e shows a single excitonic A peak at ~752 nm, a characteristic of direct bandgap semiconductor. The Raman and PL spectra taken from the different positions in the WSe<sub>2</sub> domain shows the similar shape, indicates the triangle is uniform monolayer.

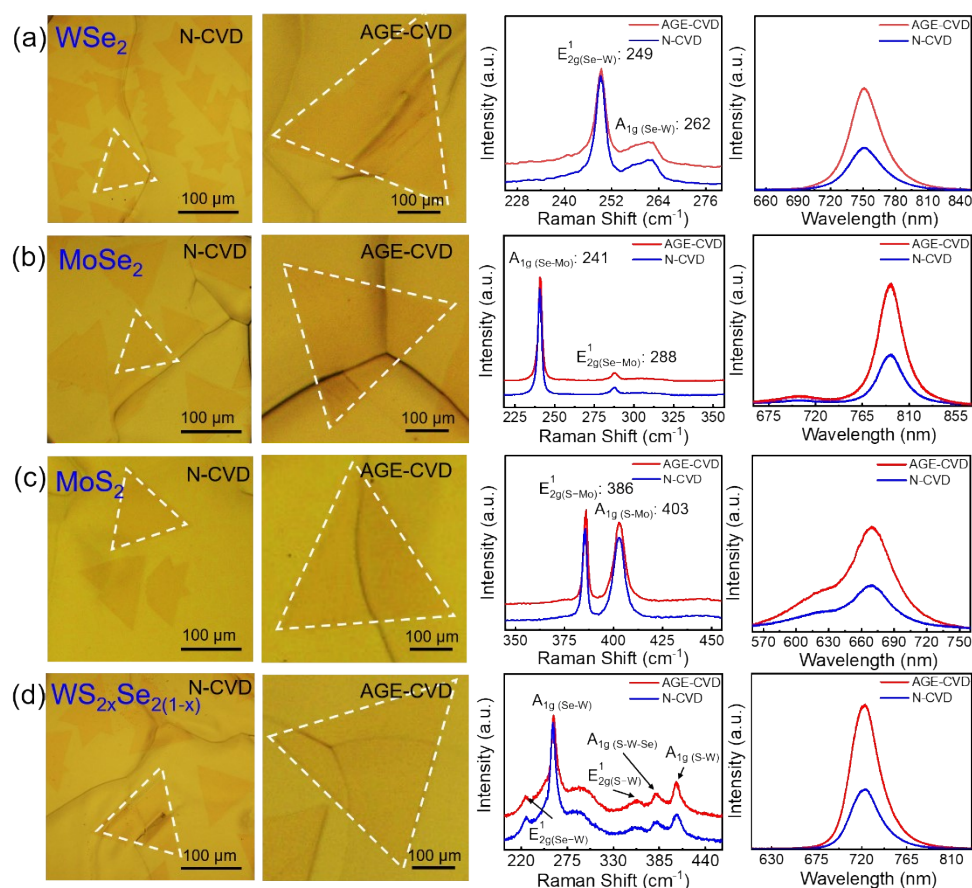

**Figure S9.** (a) WSe<sub>2</sub>, (b) MoSe<sub>2</sub>, (c) MoS<sub>2</sub> and (d) WS<sub>2x</sub>Se<sub>2(1-x)</sub> samples were obtained by N-

CVD and AGE-CVD, respectively. The corresponding Raman and PL spectra were also presented. Except for WS<sub>2</sub> we mainly discussed, these four kinds of TMDs obtain by AGE-CVD also have larger grain sizes and higher PL intensity. These results can fully demonstrate the great advantage and the universality of our AGE-CVD method for the synthesis of high-quality large-scale single-crystal TMDs.

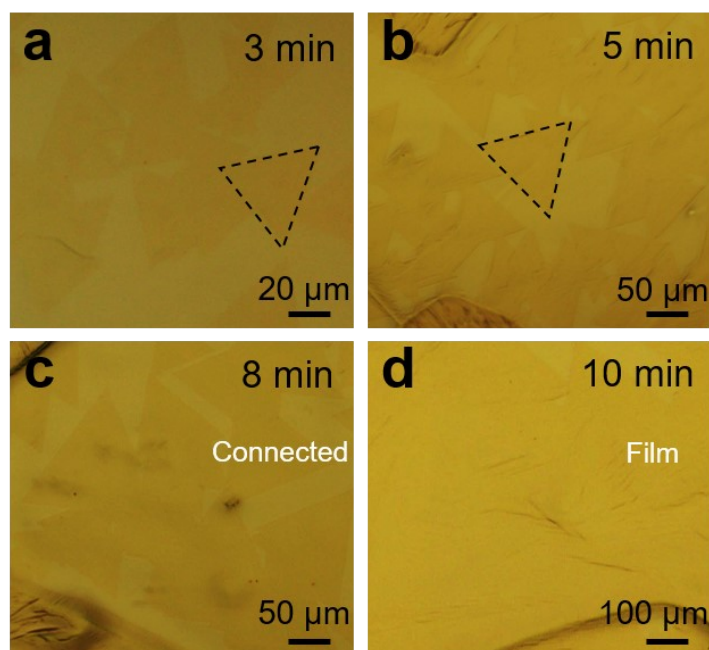

**Figure S10.** A series of optical images of WS<sub>2</sub> grown by normal CVD. The growth time for (a-d) increased from 3 to 10 min. All the CVD parameters are the same as mentioned in Figure 2. Ar flow rate was 100 sccm during the whole processes. Figure S10b shows that the grain size of individual WS<sub>2</sub> domain is smaller than 120 μm. WS<sub>2</sub> domains were easily connected with each other and finally formed a continuous film. Compared with the results in Figure 2, we can confirm the great advantages of our AGE-CVD in realizing the synthesis of submillimeter-scale WS<sub>2</sub> single crystals. AGE-CVD can dramatically decreased the nucleation density of WS<sub>2</sub> and increased the grain size for 4~5 times larger than N-CVD.



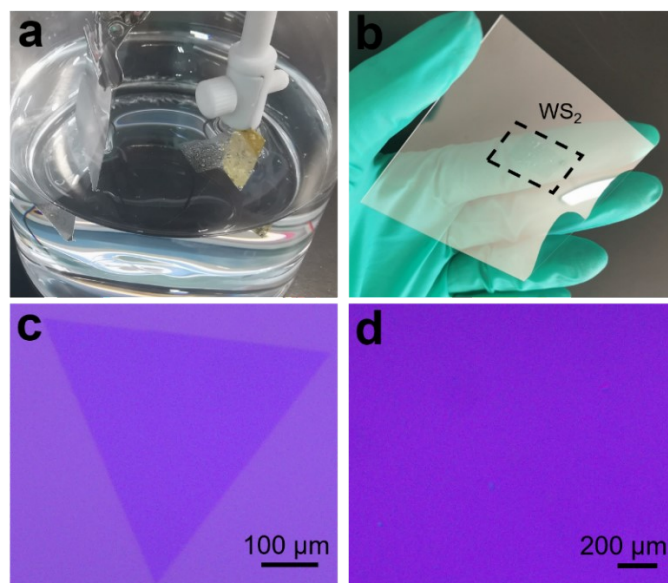

**Figure S11.** (a) Electrochemical bubbling transfer process and (b) PMMA/WS<sub>2</sub> films with a full coverage in 2 cm<sup>2</sup> transferred onto the transparent PET substrate. (c) Optical images of a submillimeter-scale single-crystal monolayer WS<sub>2</sub> flake with a size of ~520 μm and (d) a uniform polycrystalline WS<sub>2</sub> film on SiO<sub>2</sub>/Si substrates after electrochemical bubbling transfer.

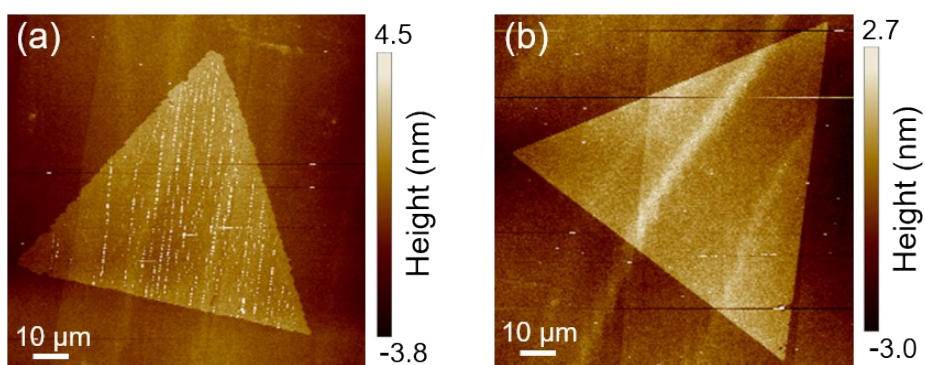

**Figure S12.** AFM images showing the transfer results by (a) wet etching method and (b) electrochemical bubbling method. There exist many wrinkles and some cracks in WS<sub>2</sub> flake in (a). On the contrary, the WS<sub>2</sub> single crystal transferred by the latter method are very uniform without any obvious wrinkle or void. To be sure, AFM is only applicable to directly scan the whole sample with a size smaller than 100 μm, due to the equipment limitations.

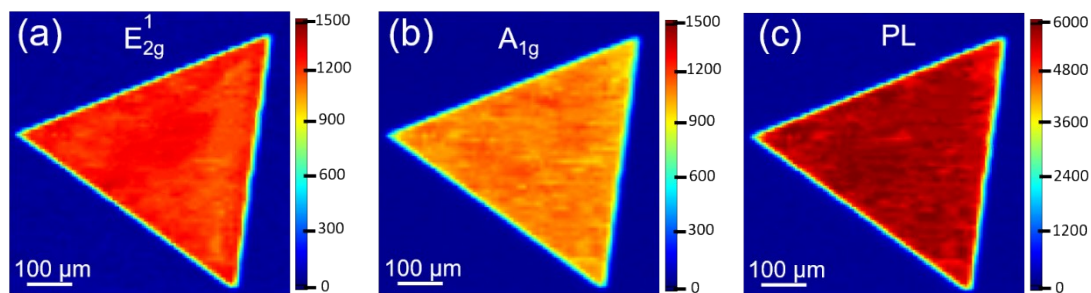

**Figure S13.** The intensity mappings of (a)  $E_{2g}^1$  ( $356\text{ cm}^{-1}$ ), (b)  $A_{1g}$  ( $418\text{ cm}^{-1}$ ) and (c) PL peak ( $613\text{ nm}$ ) of a  $\text{WS}_2$  single crystal with a grain size of  $\sim 520\text{ }\mu\text{m}$  detected on a  $\text{SiO}_2/\text{Si}$  substrate.

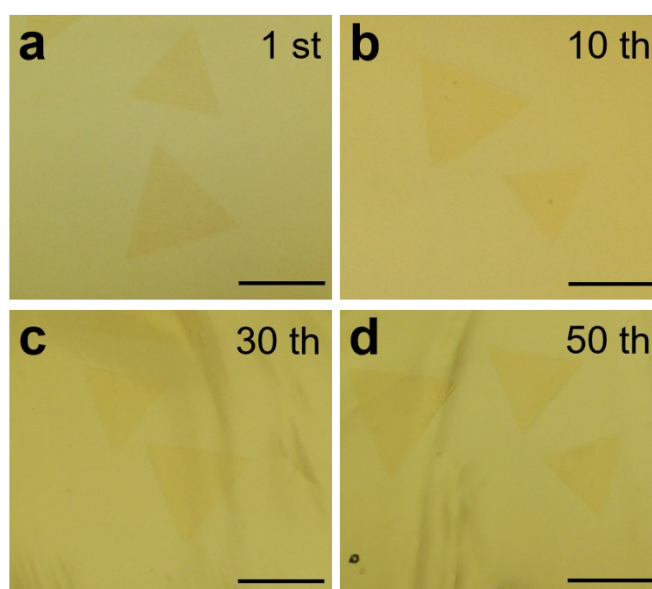

**Figure S14.**  $\text{WS}_2$  single crystals grown on the same reusable Au foils for (a) the first time, (b) 10 times, (c) 30 times and (d) 50 times, respectively. All the triangle  $\text{WS}_2$  domains were obtained at the 3<sup>rd</sup> E stage as mentioned in Figure 2 and they show the similar morphology. The scale bar in all images is  $100\text{ }\mu\text{m}$ .

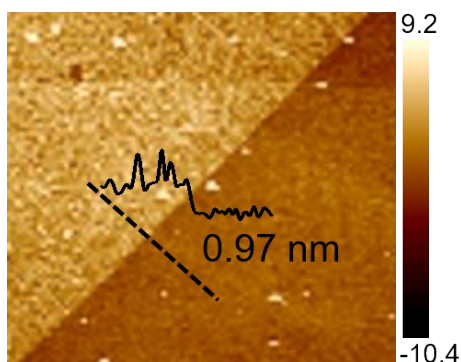

**Figure S15.** AFM height topography detected at the edge of single-crystal WS<sub>2</sub>. The height profile in the inset shows thickness of WS<sub>2</sub> is ~0.97 nm, which was measured along the black dotted line.

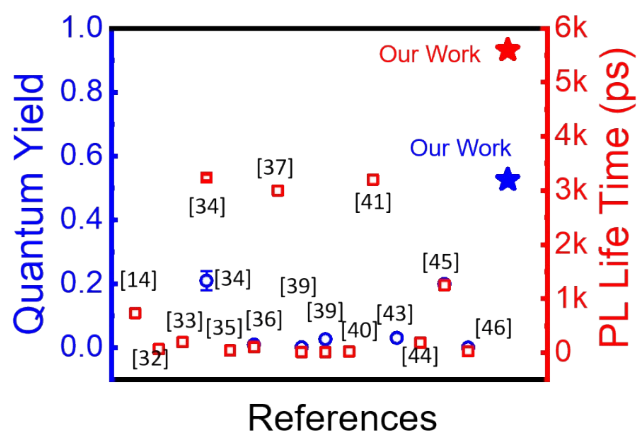

**Figure S16.** Comparison of PL performance between our WS<sub>2</sub> and reported TMDs in the literatures. The corresponding references are listed in Table S2 below.

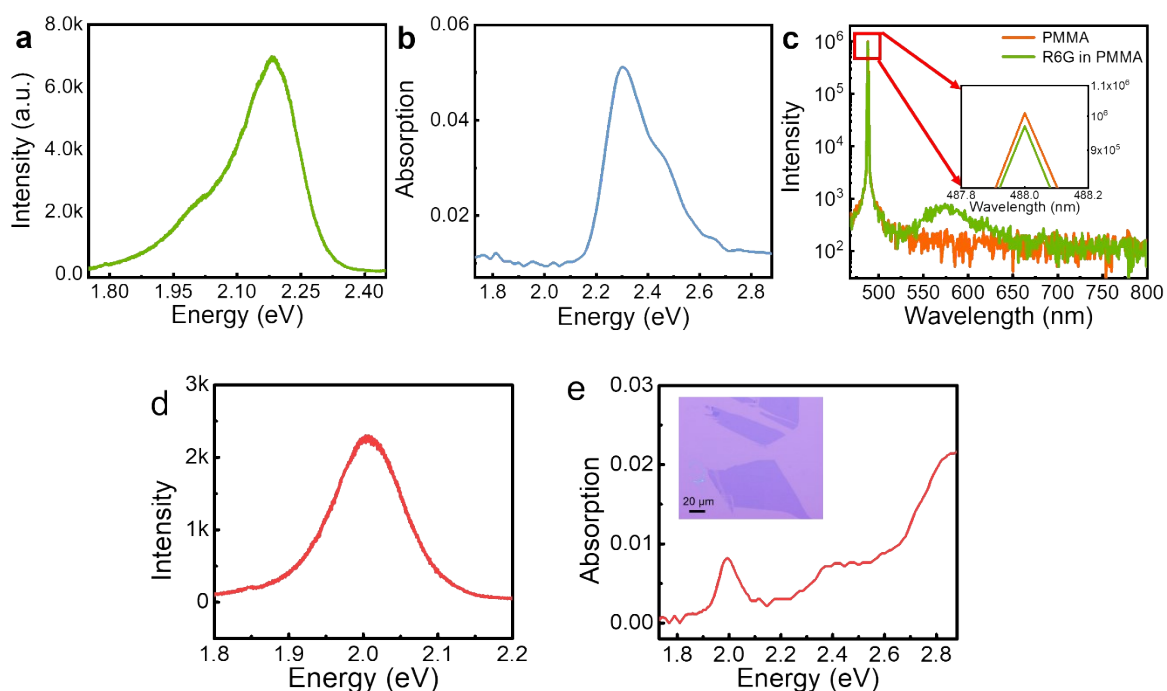

**Figure S17.** (a) PL spectra and (b) UV-vis absorption spectrum of R6G film. The wavelength of excitation laser was 488 nm, which is the same as the laser used for WS<sub>2</sub> in Figure 5. (c) PL spectra of the PMMA films with (green curve) and without (orange curve) R6G molecules measured by an integrating sphere. Inset shows the enlarged linear portion of the spectra. (d) PL spectra and (e) UV-vis absorption spectrum of mechanically-exfoliated WS<sub>2</sub> measured under the same experimental conditions. The inset in (e) shows the WS<sub>2</sub> monolayer samples obtained via mechanical exfoliation of a bulk crystal. It was measured under the same experimental conditions as shown in Fig.5.

### PL QY measurements of R6G.

The PL QY of WS<sub>2</sub> was measured with Rhodamine 6G (R6G) as reference, because it has outstanding chemical stability, high QY and no overlap between absorption and emission spectra. R6G is dispersed uniformly into a poly(methyl methacrylate) (PMMA) solution as solvent by the Roy's method.<sup>46</sup> The reference R6G film was spin-coated onto sapphire. Figure

S17 (a and b) show the PL emission and absorption of the R6G reference film. PMMA with and without R6G films were then loaded into an integrating sphere with a 488 nm laser. Corresponding PL spectra are illustrated in Figure S17c. The QY of R6G is estimated by the equation:

$$Q_R = \frac{I_e}{I_a} \quad (1)$$

Here,  $I_e$  is the emission of R6G, the difference of integrated intensity of PL spectra at  $\sim 560$  nm from PMMA with and without R6G.  $I_a$  is the absorption of R6G, the reduction of the PL peak intensity at 488 nm from PMMA without and with R6G. The measured QY of R6G ( $Q_R$ ) is calculated to be  $\sim 53.5\%$ .

### PL QY of mechanically-exfoliated WS<sub>2</sub>

By measuring the PL emission intensity and UV-vis absorption of mechanically-exfoliated WS<sub>2</sub> (Figure S17d and e) and R6G (Figure S17a and b) with the same excitation laser (488 nm). PL QY of WS<sub>2</sub> ( $Q_W$ ) is calculated to be  $\sim 25.5\%$  by using the same equation in Figure 5.

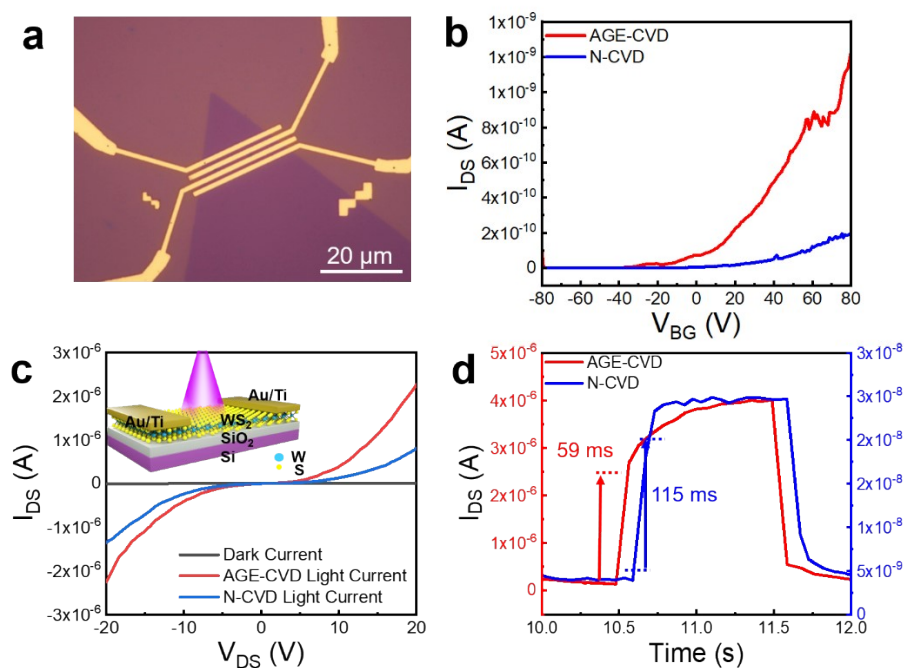

**Figure S18.** Electrical properties characterization of monolayer single-crystal WS<sub>2</sub> grown by AGE and N-CVD. (a) Optical image of the back-gate field effect transistor (FET) device based on the single-crystal WS<sub>2</sub> domain. (b) Transfer characteristic of WS<sub>2</sub> FET devices fabricated with WS<sub>2</sub> grown by AGE and N-CVD. All the measurements were taken under ambient pressure at room temperature. V<sub>ds</sub> is 0.1 V in (b). The carrier mobility ( $\mu$ ) and ON/OFF ratio of WS<sub>2</sub> domains obtained by AGE and N-CVD is 8.3 and 0.56 cm<sup>2</sup> V<sup>-1</sup> s<sup>-1</sup>, ~10<sup>3</sup> and 3×10<sup>2</sup>, respectively. (c) Transfer curves of the photodetectors tested in air with and without light illumination. The inset is the schematic diagram of photodetector. V<sub>ds</sub> is 20 V and the light illumination power is 0.1 mW with a wavelength of 405 nm. The responsivity (R) is 22.9 and 13.8 mA W<sup>-1</sup> for WS<sub>2</sub> domains obtained by AGE and N-CVD. (d) Magnified part of the time-dependent source-drain current with switch ON/OFF laser pulse.

### **FET fabrication and electrical property measurements.**

Monolayer single-crystal WS<sub>2</sub> domains were transferred onto highly doped Si substrates, then a 5 nm Ti/50 nm Au layer was deposited by electron beam evaporation as source and drain electrodes. The channel width and length of the FET device were 0.6 and 25  $\mu$ m, respectively. Electrical properties of FET were measured under ambient conditions at room temperature using an Agilent semiconductor parameter analyzer (4155C Semiconductor Parameter Analyzer). The field mobility was determined by the following equal:

$$\mu = \left( \frac{L}{WC_{ox}V_d} \right) \left( \frac{\Delta I_d}{\Delta V_g} \right) \quad (2)$$

Where L and W represent channel width and length, respectively, and C<sub>ox</sub> is the capacitance of the dielectric layer (300-nm thick SiO<sub>2</sub>).

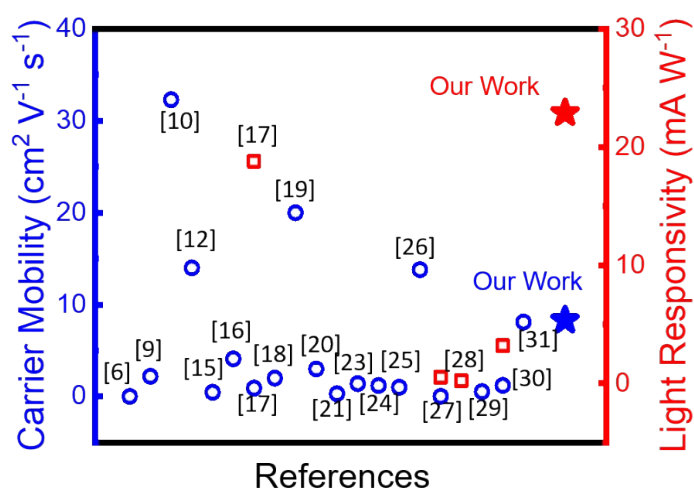

**Figure S19.** Comparison of electrical properties between our  $\text{WS}_2$  and reported CVD-grown  $\text{WS}_2$  in the literatures. The corresponding references are listed in Table S1 below. Although the carrier mobility ( $8.3 \text{ cm}^2 \text{V}^{-1} \text{s}^{-1}$ ) and light responsivity ( $22.9 \text{ mA W}^{-1}$ ) detected based on a FET device are not the highest values among these reported results in Table S1, they are still at relatively high levels. The possible reason is that the intrinsic electronic properties of  $\text{WS}_2$  may be affected by the complex device fabricating processes. We will further optimize the device fabricating process (e.g. electrode contact and device structure design) in our future work to obtain better electrical properties.

**Table S1.** Comparison of grain size, growth rate and properties of single-crystal monolayer WS<sub>2</sub> grown by CVD.

| Substrate                      | Temperature  | Time        | Size    | Growth Rate | Property                                                                           | Reference |
|--------------------------------|--------------|-------------|---------|-------------|------------------------------------------------------------------------------------|-----------|
| hBN flakes                     | 900 °C       | 10 min      | 3 μm    | 0.3 μm/min  | -                                                                                  | 1         |
| Graphite                       | 1100 °C      | 15 - 30 min | 15 μm   | 1.0 μm/min  | -                                                                                  | 2         |
| SiO <sub>2</sub> /Si           | 500 °C       | 60 min      | 12.7 μm | 0.2 μm/min  | -                                                                                  | 3         |
| SiO <sub>2</sub> /Si<br>(ZnO)  | 1000 °C      | 60 min      | 28.3 μm | 0.5 μm/min  | -                                                                                  | 4         |
| SiO <sub>2</sub> /Si           | 880 - 780 °C | 40 min      | 52 μm   | 1.3 μm/min  | -                                                                                  | 5         |
| SiO <sub>2</sub> /Si<br>(PTAS) | 800 °C       | 5 min       | 20 μm   | 4.0 μm/min  | $\mu=0.01 \text{ cm}^2 \text{ V}^{-1} \text{ s}^{-1}$<br>ON/OFF= $10^5$            | 6         |
| SiO <sub>2</sub> /Si           | 860 °C       | 60 min      | 370 μm  | 6.2 μm/min  | -                                                                                  | 7         |
| SiO <sub>2</sub> /Si           | 850 °C       | 15 min      | 160 μm  | 10.7 μm/min | -                                                                                  | 8         |
| SiO <sub>2</sub> /Si           | 1070 °C      | 15 min      | 256 μm  | 17.1 μm/min | $\mu=2.2 \text{ cm}^2 \text{ V}^{-1} \text{ s}^{-1}$<br>ON/OFF= $10^6$             | 9         |
| SiO <sub>2</sub> /Si           | 900 °C       | 10 min      | 250 μm  | 25.0 μm/min | $\mu=32.3 \text{ cm}^2 \text{ V}^{-1} \text{ s}^{-1}$<br>ON/OFF= $10^6$ (at 300 K) | 10        |
| SiO <sub>2</sub> /Si           | 750 °C       | 5 min       | 178 μm  | 35.6 μm/min | -                                                                                  | 11        |
| SiO <sub>2</sub> /Si           | 825 °C       | -           | 200 μm  | -           | $\mu=14 \text{ cm}^2 \text{ V}^{-1} \text{ s}^{-1}$                                | 12        |



|                                  |              |                                    |                               |                                          |                                                                                                                                                                                        |    |
|----------------------------------|--------------|------------------------------------|-------------------------------|------------------------------------------|----------------------------------------------------------------------------------------------------------------------------------------------------------------------------------------|----|
| SiO <sub>2</sub> /Si<br>Sapphire | 850 - 950 °C | 30 - 90 min                        | 9.7 μm                        | 0.3 μm/min                               | -                                                                                                                                                                                      | 13 |
| SiO <sub>2</sub> /Si<br>Sapphire | 850 °C       | 15 min<br>growth<br>10 min<br>etch | >15 μm                        | ~0.6 μm/min                              | -                                                                                                                                                                                      | 14 |
| Sapphire                         | 900 °C       | 60 min                             | 50 μm                         | 0.8 μm/min                               | μ=0.46 cm <sup>2</sup> V <sup>-1</sup> s <sup>-1</sup><br>ON/OFF=10 <sup>2</sup>                                                                                                       | 15 |
| Sapphire                         | 900 °C       | 60 min                             | 135 μm                        | 2.3 μm/min                               | μ=4.1 cm <sup>2</sup> V <sup>-1</sup> s <sup>-1</sup><br>ON/OFF=10 <sup>5</sup>                                                                                                        | 16 |
| Sapphire                         | 950 °C       | 40 min                             | Centimeter<br>scale film      | -                                        | μ=0.91 cm <sup>2</sup> V <sup>-1</sup> s <sup>-1</sup> ;<br>ON/OFF=10 <sup>6</sup> ;<br>R=18.8 mA/W<br>(V <sub>g</sub> =60 V, Vacuum);<br>t< 4.5 ms(R=0.2 μA W <sup>-1</sup> ,<br>Air) | 17 |
| Au foil                          | 800 °C       | 240 min                            | 600 μm                        | 2.5 μm/min                               | μ=2 cm <sup>2</sup> V <sup>-1</sup> s <sup>-1</sup><br>ON/OFF=5×10 <sup>7</sup>                                                                                                        | 18 |
| Au foil                          | 935 °C       | 5 min<br>15 min                    | 420 μm<br>600 mm <sup>2</sup> | 84.0 μm/min<br>40.0 mm <sup>2</sup> /min | μ=20 cm <sup>2</sup> V <sup>-1</sup> s <sup>-1</sup><br>ON/OFF=10 <sup>8</sup>                                                                                                         | 19 |
| Atomic<br>sawtooth Au<br>foil    | 800 °C       | 20 min                             | 5×5 mm <sup>2</sup>           | 1.3 mm <sup>2</sup> /min                 | μ=3 cm <sup>2</sup> V <sup>-1</sup> s <sup>-1</sup><br>ON/OFF=10 <sup>8</sup>                                                                                                          | 20 |
| SiO <sub>2</sub> /Si             | 825 °C       | 45 min                             | 4-in. film                    | 0.09-in./min                             | μ=0.3 cm <sup>2</sup> V <sup>-1</sup> s <sup>-1</sup>                                                                                                                                  | 21 |

|                      |            |        |             |                           |                                                                                                                                |    |
|----------------------|------------|--------|-------------|---------------------------|--------------------------------------------------------------------------------------------------------------------------------|----|
|                      |            |        |             |                           | ON/OFF=10 <sup>3</sup>                                                                                                         |    |
| SiO <sub>2</sub> /Si | 640-650 °C | 20 min | 10 μm       | 0.5 μm/min                | ON/OFF=10 <sup>4</sup>                                                                                                         | 22 |
| SiO <sub>2</sub> /Si | 1000 °C    | -      | 200 μm      | -                         | μ= 1.4 cm <sup>2</sup> V <sup>-1</sup> s <sup>-1</sup>                                                                         | 23 |
| SiO <sub>2</sub>     | 950 °C     | 8 min  | 450 μm      | 56.25 μm/min              | μ= 1.2 cm <sup>2</sup> V <sup>-1</sup> s <sup>-1</sup><br>ON/OFF=10 <sup>6</sup>                                               | 24 |
| SiO <sub>2</sub> /Si | 825 °C     | 15 min | -           | -                         | μ= 0.1-1 cm <sup>2</sup> V <sup>-1</sup> s <sup>-1</sup><br>ON/OFF>10 <sup>6</sup>                                             | 25 |
| Mica                 | 860 °C     | -      | ~500 μm     | 30 μm/min                 | μ= 13.8 cm <sup>2</sup> V <sup>-1</sup> s <sup>-1</sup><br>ON/OFF=5.5×10 <sup>8</sup>                                          | 26 |
| sapphire             | 980 °C     | 40 min | 2-inch film | 49.1 mm <sup>2</sup> /min | μ=0.02 cm <sup>2</sup> V <sup>-1</sup> s <sup>-1</sup><br>ON/OFF>5.5×10 <sup>3</sup><br>t <560 μs<br>R=0.52 mA W <sup>-1</sup> | 27 |
| Sapphire             | 900 °C     | 15 min | 5mm film    | -                         | R= 0.22 mA W <sup>-1</sup>                                                                                                     | 28 |
| SiO <sub>2</sub> /Si | 950 °C     | 3 min  | 100 μm      | 33.33 μm/min              | μ= 0.53 cm <sup>2</sup> V <sup>-1</sup> s <sup>-1</sup><br>ON/OFF= 10 <sup>6</sup>                                             | 29 |

|                      |               |               |               |                    |                                                                                                                                                                                                        |                  |
|----------------------|---------------|---------------|---------------|--------------------|--------------------------------------------------------------------------------------------------------------------------------------------------------------------------------------------------------|------------------|
| Sapphire             | 950 °C        | 10-40 min     | 550 μm        | 13.75 μm/min       | $\mu = 1.21 \text{ cm}^2 \text{ V}^{-1} \text{ s}^{-1}$<br>$R = 3.2 \text{ mA W}^{-1}$                                                                                                                 | 30               |
| SiO <sub>2</sub> /Si | 950 °C        | 30 min        | 150 μm        | 5 μm/min           | $\mu = 8.1 \text{ cm}^2 \text{ V}^{-1} \text{ s}^{-1}$<br>ON/OFF= 10 <sup>5</sup>                                                                                                                      | 31               |
| <b>Au foil</b>       | <b>850 °C</b> | <b>36 min</b> | <b>520 μm</b> | <b>14.4 μm/min</b> | <b><math>\mu = 8.3 \text{ cm}^2 \text{ V}^{-1} \text{ s}^{-1}</math></b><br><b>ON/OFF=10<sup>3</sup></b><br><b>R=22.9 mA W<sup>-1</sup></b><br><b>t<sub>rise</sub>=59 ms ; t<sub>decay</sub>=77 ms</b> | <b>This work</b> |

**Table S2.** PL performance of reported TMDs.

| Materials        | Synthetic Method       | Treatment         | Quantum Yield |       | Fluorescence Lifetime |                       | Reference |
|------------------|------------------------|-------------------|---------------|-------|-----------------------|-----------------------|-----------|
|                  |                        |                   |               |       | Before                | After                 |           |
| WS <sub>2</sub>  | Mechanical exfoliation | OA treatment      | -             |       | Before                | After                 | 32        |
|                  |                        |                   |               |       | Fast decay<br>=64 ps  | Fast decay<br>=248 ps |           |
| WS <sub>2</sub>  | Mechanical exfoliation | -                 | -             |       | 0.195 ns              |                       | 33        |
| WS <sub>2</sub>  | Mechanical exfoliation | -                 | 21±3 %        |       | 3.24±0.05 ns          |                       | 34        |
| MoS <sub>2</sub> | Mechanical exfoliation | UV-TFSI treatment | -             |       | Before                | After                 | 35        |
|                  |                        |                   |               |       | 40 ps                 | 1.35 ns               |           |
| MoS <sub>2</sub> | Mechanical             | TFSI treatment    | Before        | After | Before                | After                 | 36        |

|                  |                                    |                                                    |                                                                                    |                                                                                       |                    |                       |    |
|------------------|------------------------------------|----------------------------------------------------|------------------------------------------------------------------------------------|---------------------------------------------------------------------------------------|--------------------|-----------------------|----|
|                  | exfoliation                        |                                                    | 1 %                                                                                | 95 %                                                                                  | 100 ps             | $10.8 \pm 0.6$ ns     |    |
| MoS <sub>2</sub> | Exfoliation                        | -                                                  | -                                                                                  |                                                                                       | 3 ns               |                       | 37 |
| MoS <sub>2</sub> | Mechanical exfoliation             | TFSI treatment                                     | -                                                                                  |                                                                                       | Before             | After                 | 38 |
|                  |                                    |                                                    |                                                                                    |                                                                                       | -                  | 10.2 ns               |    |
|                  |                                    | varying V <sub>g</sub> and the incident pump power | V <sub>g</sub> =0V<br>G = $6 \times 10^{17}$<br>cm <sup>-2</sup> · s <sup>-1</sup> | V <sub>g</sub> = -20V<br>G = $6 \times 10^{15}$<br>cm <sup>-2</sup> · s <sup>-1</sup> | V <sub>g</sub> =0V | V <sub>g</sub> = -20V |    |
|                  |                                    | 0.1 %                                              | 75±10%                                                                             | -                                                                                     | 6.9 ns             |                       |    |
| MoS <sub>2</sub> | CVD                                | TFMS treatment                                     | Before                                                                             | After                                                                                 | Before             | After                 | 39 |
|                  |                                    |                                                    | 0.2 %                                                                              | 14.1 %                                                                                | 11 ps              | 50 ps                 |    |
| WS <sub>2</sub>  |                                    |                                                    | Before                                                                             | After                                                                                 | Before             | After                 |    |
|                  |                                    |                                                    | 2.7 %                                                                              | 56.7 %                                                                                | 8 ps               | 36 ps                 |    |
| WS <sub>2</sub>  | CVD                                | Oxygen incorporation                               | Before                                                                             | After                                                                                 | Before             | After                 | 40 |
|                  |                                    |                                                    | -                                                                                  | 9.3 %                                                                                 | 21.6 ps            | 109.3 ps              |    |
| WS <sub>2</sub>  | CVD                                | -                                                  | -                                                                                  |                                                                                       | 2H Phase           | 3R Phase              | 41 |
|                  |                                    |                                                    |                                                                                    |                                                                                       | 3.2 ns             | 1.1 ns                |    |
| WS <sub>2</sub>  | CVD<br>( Spin-coated with Nafion ) | applying a uniaxial strain                         | Before                                                                             | After                                                                                 | -                  |                       | 42 |
|                  |                                    |                                                    | -                                                                                  | 70%±10%                                                                               |                    |                       |    |
| WSe <sub>2</sub> | CVD                                | SEMD process                                       | Before                                                                             | After                                                                                 | -                  |                       | 43 |
|                  |                                    |                                                    | 3.1 %                                                                              | 60 %                                                                                  |                    |                       |    |
| MoS <sub>2</sub> | CVD                                | TFSI- treatment                                    | Before                                                                             | After                                                                                 | Before             | After                 | 44 |
|                  |                                    |                                                    | -                                                                                  | 31±8 %                                                                                | 0.19 ns            | 4.2 ns                |    |
| WS <sub>2</sub>  | GE-MOCVD                           | -                                                  | -                                                                                  |                                                                                       | Pristine           | After                 | 14 |

|                 |         |                                                           |                         |                         | Transfer                |                         |                  |
|-----------------|---------|-----------------------------------------------------------|-------------------------|-------------------------|-------------------------|-------------------------|------------------|
|                 |         |                                                           |                         |                         | 0.733 ns                | 1.15 ns                 |                  |
| WS <sub>2</sub> | CVT     | TFSI treatment                                            | Before                  | After                   | Before                  | After                   | 45               |
|                 |         |                                                           | 20 %                    | over 95%                | 1.25 ns                 | 3.4±0.3 ns              |                  |
| WS <sub>2</sub> | PVD     | WO <sub>3</sub> -WS <sub>2</sub> bilayer heterostructures | Before                  | After                   | Before                  | After                   | 46               |
|                 |         |                                                           | 0.1 %                   | 11.6 %                  | 25.7 ps                 | 1397.8 ps               |                  |
| WS <sub>2</sub> | AGE-CVD | -                                                         | <b>1<sup>st</sup> G</b> | <b>5<sup>th</sup> G</b> | <b>1<sup>st</sup> G</b> | <b>5<sup>th</sup> G</b> | <b>This work</b> |
|                 |         |                                                           | <b>13.7 %</b>           | <b>52.6 %</b>           | <b>1.8 ns</b>           | <b>5.6 ns</b>           |                  |

## References

- [1] M. Okada, T. Sawazaki, K. Watanabe, T. Taniguchi, H. Hibino, H. Shinohara, R. Kitaura, *ACS Nano* **2014**, *8*, 8273.
- [2] Y. Kobayashi, S. Sasaki, S. Mori, H. Hibino, Z. Liu, K. Watanabe, T. Taniguchi, K. Suenaga, Y. Maniwa, Y. Miyata, *ACS Nano* **2015**, *9*, 4056.
- [3] Z. Xu, Y. Lv, J. Li, F. Huang, P. Nie, S. Zhang, S. Zhao, S. Zhao, G. Wei, *RSC Adv.* **2019**, *9*, 29628.
- [4] Z. Xu, Y. Lv, F. Huang, C. Zhao, S. Zhao, G. Wei, *Materials* **2019**, *12*, 1883.
- [5] Q. Fu, W. Wang, L. Yang, J. Huang, J. Zhang, B. Xiang, *RSC Adv.* **2015**, *5*, 15795.
- [6] Y.-H. Lee, L. Yu, H. Wang, W. Fang, X. Ling, Y. Shi, C.-T. Lin, J.-K. Huang, M.-T. Chang, C.-S. Chang, M. Dresselhaus, T. Palacios, L.-J. Li, J. Kong, *Nano Lett.* **2013**, *13*, 1852.
- [7] Y. Rong, Y. Fan, A. L. Koh, A. W. Robertson, K. He, S. Wang, H. Tan, R. Sinclair, J. H. Warner, *Nanoscale* **2014**, *6*, 12096.
- [8] S. Hu, X. Wang, L. Meng, X. Yan, *J. Mater. Sci.* **2017**, *52*, 7215.
- [9] L. Dong, Y. Wang, J. Sun, C. Pan, Q. Zhang, L. Gu, B. Wan, C. Song, F. Pan, C. Wang, Z. Tang, J. Zhang, *2D Mater.* **2019**, *6*, 015007.
- [10] Y. Yue, J. C. Chen, Y. Zhang, S. S. Ding, F. Zhao, Y. Wang, D. Zhang, R. J. Li, H. Dong, W. Hu, Y. Feng, W. Feng, *ACS Appl. Mater. Interfaces* **2018**, *10*, 22435.
- [11] C. Cong, J. Shang, X. Wu, B. Cao, N. Peimyoo, C. Qiu, L. Sun, T. Yu, *Adv. Opt. Mater.* **2014**, *2*, 131.
- [12] S. Li, S. Wang, D.-M. Tang, W. Zhao, H. Xu, L. Chu, Y. Bando, D. Golberg, G. Eda, *Appl. Mater. Today* **2015**, *1*, 60.
- [13] L. Tang, T. Li, Y. Luo, S. Feng, Z. Cai, H. Zhang, B. Liu, H.-M. Cheng, *ACS Nano* **2020**, *14*, 4646.
- [14] A. Cohen, A. Patsha, P. K. Mohapatra, M. Kazes, K. Ranganathan, L. Houben, D. Oron, A. Ismach, *ACS Nano* **2021**, *15*, 526.
- [15] Y. Zhang, Y. Zhang, Q. Ji, J. Ju, H. Yuan, J. Shi, T. Gao, D. Ma, M. Liu, Y. Chen, X. Song, H. Y. Hwang, Y. Cui, Z. Liu, *ACS Nano* **2013**, *7*, 8963.

- [16] Z.-Q. Xu, Y. Zhang, S. Lin, C. Zheng, Y. L. Zhong, X. Xia, Z. Li, P. J. Sophia, M. S. Fuhrer, Y.-B. Cheng, Q. Bao, *ACS Nano* **2015**, *9*, 6178.
- [17] C. Lan, C. Li, Y. Yin, Y. Liu, *Nanoscale* **2015**, *7*, 5974.
- [18] Y. Gao, Z. Liu, D.-M. Sun, L. Huang, L.-P. Ma, L.-C. Yin, T. Ma, Z. Zhang, X.-L. Ma, L.-M. Peng, H.-M. Cheng, W. Ren, *Nat. Commun.* **2015**, *6*, 8569.
- [19] S. J. Yun, S. H. Chae, H. Kim, J. C. Park, J.-H. Park, G. H. Han, J. S. Lee, S. M. Kim, H. M. Oh, J. Seok, M. S. Jeong, K. K. Kim, Y. H. Lee, *ACS Nano* **2015**, *9*, 5510.
- [20] S. H. Choi, H.-J. Kim, B. Song, Y. I. Kim, G. Han, H. T. T. Nguyen, H. Ko, S. Boandoh, J. H. Choi, C. S. Oh, H. J. Cho, J. W. Jin, Y. S. Won, B. H. Lee, S. J. Yun, B. G. Shin, H. Y. Jeong, Y.-M. Kim, Y.-K. Han, Y. H. Lee, S. M. Kim, K. K. Kim, *Adv Mater.* **2021**, *33*, 2006601.
- [21] Z. Jia, J. Dong, L. Liu, J. Xiang, A. Nie, F. Wen, C. Mu, B. Wang, K. Zhai, Z. Yu, M. Kang and Z. Liu, *Appl. Phys. Lett.*, **2019**, *115*, 163104.
- [22] M. Okada, N. Okada, W. H. Chang, T. Endo, A. Ando, T. Shimizu, T. Kubo, Y. Miyata and T. Irisawa, *Sci Rep*, **2019**, *9*, 17678.
- [23] Z. Jia, W. Hu, J. Xiang, F. Wen, A. Nie, C. Mu, Z. Zhao, B. Xu, Y. Tian and Z. Liu, *Nanotechnology*, **2018**, *29*, 255705.
- [24] Z. Wang, H. Yang, S. Zhang, J. Wang, K. Cao, Y. Lu, W. Hou, S. Guo, X. A. Zhang and L. Wang, *Nanoscale*, **2019**, *11*, 22440-22445.
- [25] F. Zhang, Y. F. Lu, D. S. Schulman, T. Y. Zhang, K. Fujisawa, Z. Lin, Y. Lei, A. L. Elias, S. Das, S. B. Sinnott and M. Terrones, *Sci. Adv.*, **2019**, *5*, 8.
- [26] S. Zhou, L. Liu, S. Cui, X. Ping, D. Hu and L. Jiao, *Nano Res.*, **2020**, *14*, 1659-1662.
- [27] C. Y. Lan, Z. Y. Zhou, Z. F. Zhou, C. Li, L. Shu, L. F. Shen, D. P. Li, R. T. Dong, S. P. Yip and J. Ho, *Nano Res.*, **2018**, *11*, 3371-3384.
- [28] Z. Wan, Y. Wu, W. Yu, Y. Dong, Y. Huang and Q. Bao, *Phys. Status. Solidi. Rapid. Res. Lett.* **2019**, *13*, 1900480.
- [29] Y. Sheng, H. Tan, X. Wang and J. H. Warner, *Chem. Mater.*, 2017, *29*, 4904-4911.
- [30] C. Lan, X. Kang, R. Wei, Y. Meng, S. Yip, H. Zhang and J. C. Ho, *ACS Appl. Mater. Interfaces*, **2019**, *11*, 35238-35246.

- [31] J. Chen, K. Shao, W. Yang, W. Tang, J. Zhou, Q. He, Y. Wu, C. Zhang, X. Li, X. Yang, Z. Wu and J. Kang, *ACS Appl. Mater. Interfaces*, **2019**, 11, 19381-19387.
- [32] A. O. A. Tanoh, J. Alexander-Webber, J. Xiao, G. Delport, C. A. Williams, H. Bretscher, N. Gauriot, J. Allardice, R. Pandya, Y. Fan, Z. Li, S. Vignolini, S. D. Stranks, S. Hofmann, A. Rao, *Nano Lett.* **2019**, 19, 6299.
- [33] H. Liu, T. Wang, C. Wang, D. Liu, J. Luo, *J. Phys. Chem. C*, **2019**, 123, 10087.
- [34] S. E. Barker, S. Wang, R. H. Godiksen, G. W. Castellanos, M. Berghuis, T. V. Raziman, A. G. Curto, J. G. Rivas, *Adv. Opt. Mater.* **2019**, 7, 1900351.
- [35] Y. Yamada, K. Shinokita, Y. Okajima, S. N. Takeda, Y. Matsushita, K. Takei, T. Yoshimura, A. Ashida, N. Fujimura, K. Matsuda, D. Kiriya, *ACS Appl. Mater. Interfaces* **2020**, 12, 36496.
- [36] M. Amani, D.-H. Lien, D. Kiriya, J. Xiao, A. Azcatl, J. Noh, S. R. Madhvapathy, R. Addou, K. C. Santosh, M. Dubey, K. Cho, R. M. Wallace, S.-C. Lee, J.-H. He, J. W. Ager, X. Zhang, E. Yablonovitch, A. Javey, *Science* **2015**, 350, 1065.
- [37] Y. Xu, S. Chen, Z. Dou, Y. Ma, Y. Mi, W. Du, Y. Liu, J. Zhang, J. Chang, C. Liang, J. Zhou, H. Guo, P. Gao, X. Liu, Y. Che, Y. Zhang, *Mater. Horiz.* **2019**, 6, 1416.
- [38] D.-H. Lien, S. Z. Uddin, M. Yeh, M. Amani, H. Kim, J. W. Ager, E. Yablonovitch, A. Javey, *Science* **2019**, 364, 468.
- [39] Q. Feng, Y. Sun, Y. Li, J. Yan, W. Zhong, G. Yang, W. Liu, H. Xu, Y. Liu, *Laser Photonics Rev.* **2021**, 15, 2100104.
- [40] Q. Cui, Z. Luo, Q. Cui, W. Zhu, H. Shou, C. Wu, Z. Liu, Y. Lin, P. Zhang, S. Wei, H. Yang, S. Chen, A. Pan, L. Song, *Adv. Funct. Mater.* **2021**, 31, 2105339.
- [41] P. Kumar, N. C. Verma, N. Goyal, J. Biswas, S. Lodha, C. K. Nandi, V. Balakrishnan, *Nanoscale* **2018**, 10, 3320.
- [42] H. Kim, S. Z. Uddin, N. Higashitarumizu, E. Rabani, A. Javey, *Science* **2021**, 373, 448.
- [43] H. Kim, G. H. Ahn, J. Cho, M. Amani, J. P. Mastandrea, C. K. Groschner, D.-H. Lien, Y. B. Zhao, J. W. Ager, M. C. Scott, D. C. Chrzan, A. Javey, *Sci. Adv.* **2019**, 5, eaau4728.



- [44] M. Amani, R. A. Burke, X. Ji, P. Zhao, D.-H. Lien, P. Taheri, G. H. Ahn, D. Kirya, J. W. Ager, E. Yablonovitch, J. Kong, M. Dubey, A. Javey, *ACS Nano* **2016**, *10*, 6535.
- [45] M. Amani, P. Taheri, R. Addou, G. H. Ahn, D. Kiriya, D.-H. Lien, J. W. Ager, R. M. Wallace, A. Javey, *Nano Lett.* **2016**, *16*, 2786.
- [46] B. Zheng, W. Zheng, Y. Jiang, S. Chen, D. Li, C. Ma, X. Wang, W. Huang, X. Zhang, H. Liu, F. Jiang, L. Li, X. Zhuang, X. Wang, A. Pan, *J. Am. Chem. Soc.* **2019**, *141*, 11754.
